# Supplementary material for: Diagnostic accuracy of PCR for detecting ALK gene rearrangement in NSCLC patients: A systematic review and meta-analysis
Source: PubMed Central journal article supplement (PMC5650430; doi:10.18632/oncotarget.17914), 2017-05-17
Supplement: oncotarget-08-75400-s001.pdf [file oncotarget-08-75400-s001.pdf]

# Diagnostic accuracy of PCR for detecting ALK gene rearrangement in NSCLC patients: A systematic review and meta-analysis

## SUPPLEMENTARY MATERIALS

**Supplementary Table 1: Characteristics of studies included in the review.** See Supplementary\_Table\_1

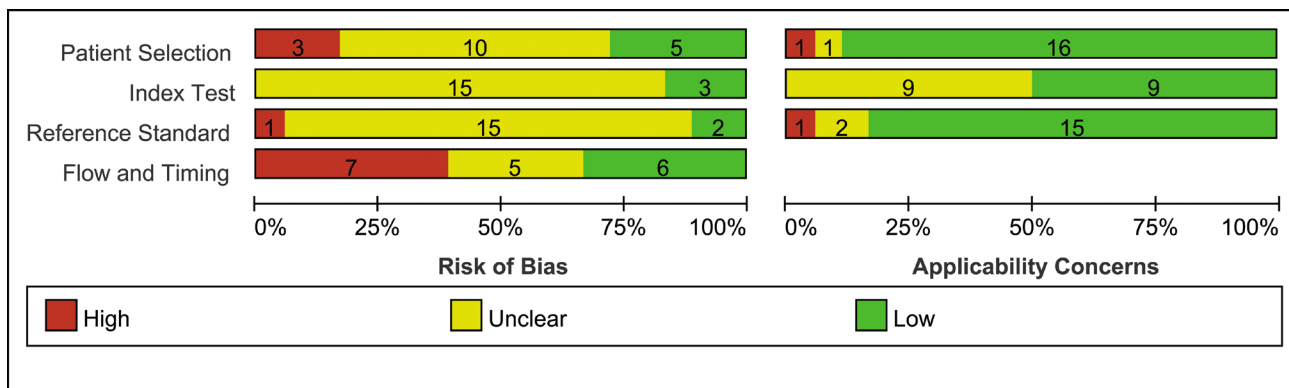

**Supplementary Figure 1: Risk of bias and applicability concerns graph review authors’ judgements about each domain presented as percentages across included studies.**

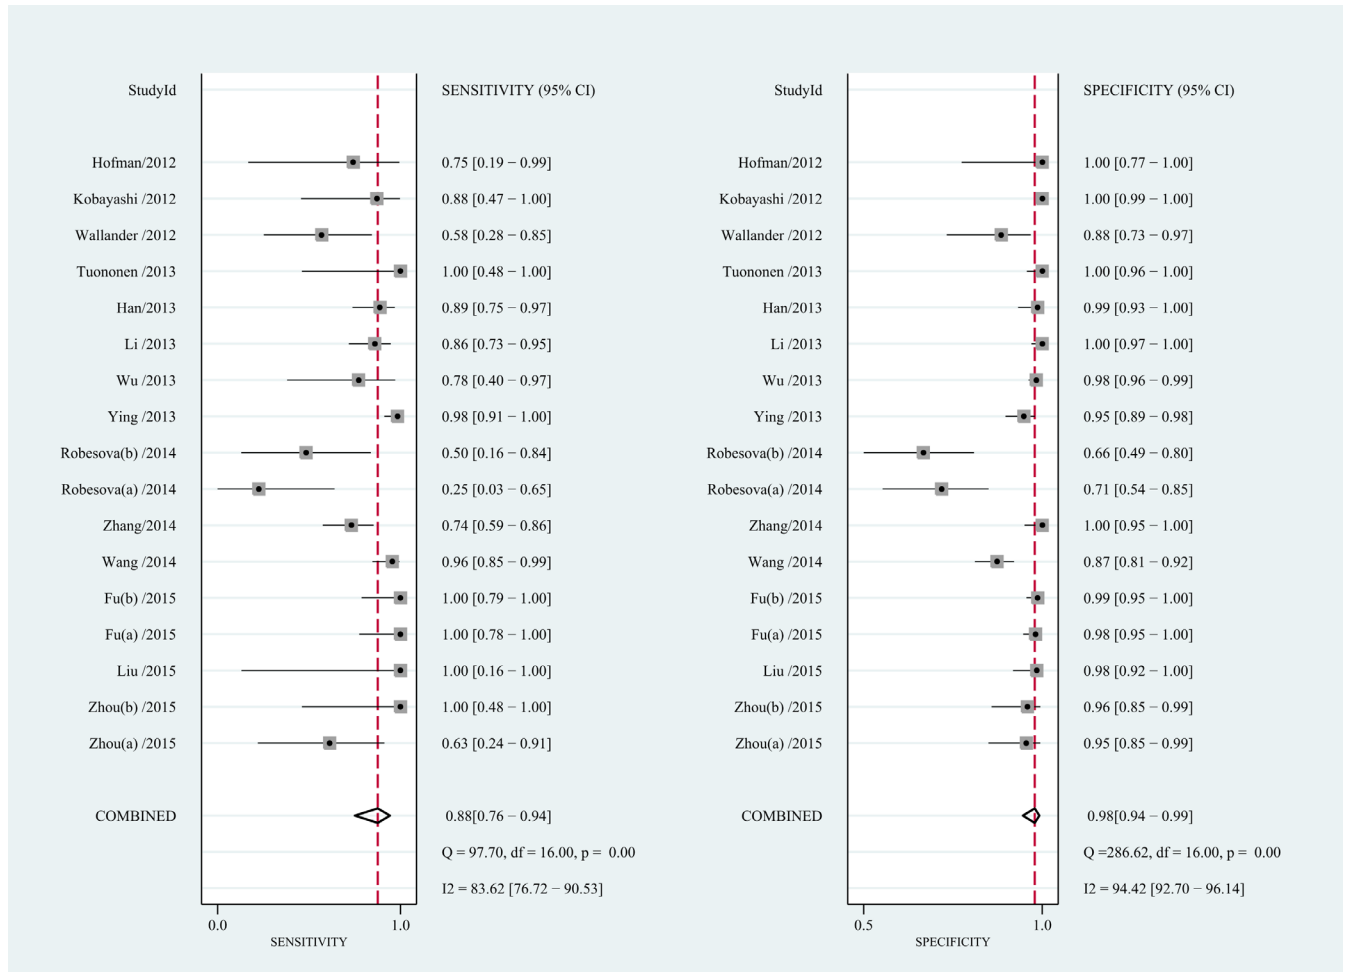

**Supplementary Figure 2: Subgroup analysis in language of the included studies Subgroup analysis in language of the included studies.**

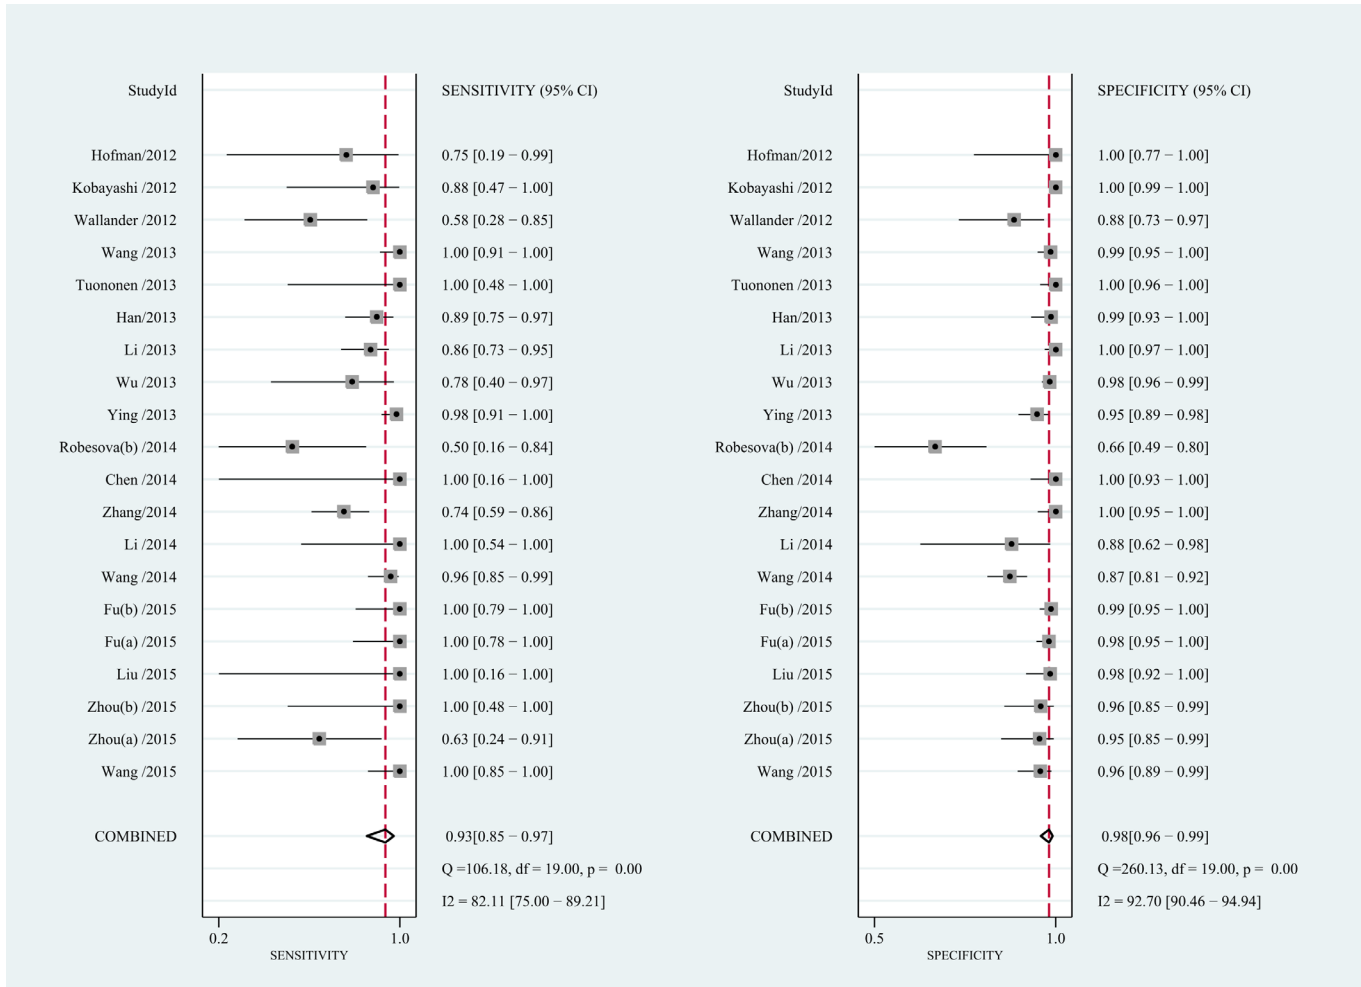

**Supplementary Figure 3: Subgroup analysis in PCR of the included studies.**
